# Rumen microbial diversity in Svalbard reindeer, with particular emphasis on methanogenic archaea

Monica A. Sundset<sup>1</sup>, Joan E. Edwards<sup>2</sup>, Yan Fen Cheng<sup>3</sup>, Roberto S. Senosiain<sup>1</sup>, Maria N. Fraile<sup>1</sup>, Korinne S. Northwood<sup>4</sup>, Kirsti E. Præsteng<sup>1</sup>, Trine Glad<sup>1,5</sup>, Svein D. Mathiesen<sup>6,7</sup> & André-Denis G. Wright<sup>4</sup>

<sup>1</sup>Department of Arctic Biology, Institute of Medical Biology, University of Tromsø, Tromsø, Norway; <sup>2</sup>Institute of Biological, Environmental and Rural Sciences, Aberystwyth University, Aberystwyth, Wales, UK; <sup>3</sup>College of Animal Science and Technology, Nanjing Agricultural University, Nanjing, China; <sup>4</sup>CSIRO Livestock Industries, Queensland Bioscience Precinct, St Lucia, Qld, Australia; <sup>5</sup>Department of Pharmacology, Institute of Pharmacy, University of Tromsø, Tromsø, Norway; <sup>6</sup>Saami University College, Guovdageaidnu, Norway; and <sup>7</sup>The Norwegian School of Veterinary Science, Tromsø, Norway

**Correspondence:** Monica A. Sundset, Department of Arctic Biology, Institute of Medical Biology, University of Tromsø, 9037 Tromsø, Norway. Tel.: +47 776 447 90; fax: +47 776 457 70; e-mail: monica.a.sundset@uit.no

**Present address:** André-Denis G. Wright, University of Vermont, Burlington, VT, USA.

Received 23 January 2009; revised 15 June 2009; accepted 10 July 2009.  
Final version published online 24 August 2009.

DOI:10.1111/j.1574-6941.2009.00750.x

Editor: Julian Marchesi

## Keywords

methanogens; bacteria; ciliate protozoa; reindeer; rumen; Svalbard.

## Abstract

Ruminal methanogens, bacteria and ciliate protozoa of Svalbard reindeer grazing natural pastures in October (late fall) and April (late winter) were investigated using molecular-based approaches. The appetite of the Svalbard reindeer peaks in August (summer) and is at its lowest in March (winter). Microbial numbers, quantified by real-time PCR, did not change significantly between October and April, when food intakes are at similar levels, although the numbers of methanogens tended to be higher in October ( $P = 0.074$ ), and ciliate numbers tended to be higher in April ( $P = 0.055$ ). Similarly, no change was detected in the bacterial and protozoal population composition by rRNA gene-based denaturing gradient gel electrophoresis analysis. Dominant methanogens were identified using a 16S rRNA gene library (97 clones) prepared from pooled PCR products from reindeer on October pasture ( $n = 5$ ). Eleven of the 22 distinct operational taxonomic units (OTUs) generated exhibited a high degree of sequence similarity to methanogens affiliated with *Methanobacteriales* (eight OTUs), *Methanomicrobiales* (one OTU) and *Methanosarcinales* (two OTUs). The remaining 11 OTUs (53% of the clones) were associated with a cluster of uncultivated ruminal archaea. This study has provided important insights into the rumen microbiome of a high-arctic herbivorous animal living under harsh nutritional conditions, and evidence suggesting that host type affects the population size of ruminal methanogens.

## Introduction

Svalbard reindeer (*Rangifer tarandus platyrhynchus*) survive food scarcity and periods of starvation during 8 months of winter in the high-arctic desert island Svalbard (74–81°N, 10–35°E) (Fig. 1). They experience extreme variations in day length throughout the year, resulting in large seasonal changes in appetite that phase with their activity cycle (van Oort *et al.*, 2007). Maximum food intake is in August, when the food nutrient content, digestibility and availability are at its peak, with the minimum intake in March being only about one-third of that during the summer, while intake and activity are similar in October (late fall) and April (late winter) (Larsen *et al.*, 1985; Mathiesen *et al.*, 2005; van Oort *et al.*, 2007). Hence, pasture quality is high in summer, while

ruminal production of energy-rich short-chain fatty acids (SCFA) is almost negligible in winter, reflecting the poor quality of their diet during this time of the year (Sørmo *et al.*, 1999; Mathiesen *et al.*, 2005).

Optimization of energy intake is essential during winter, when pasture vegetation consists of mosses and low-quality vascular plants. In contrast, during the summer, Svalbard reindeer feed on lush tundra vegetation consisting of grasses, herbs, dwarf shrubs and sedges (Tyler & Øritsland, 1989; Sørmo *et al.*, 1999; Mathiesen *et al.*, 2005). Svalbard reindeer are foregut fermenters whose digestion of dietary material depends on a symbiotic association with the complex microbiota resident within their rumen (Mathiesen *et al.*, 2005). Recent data suggest that the coevolution between reindeer and their heterogeneous diet of arctic plants has

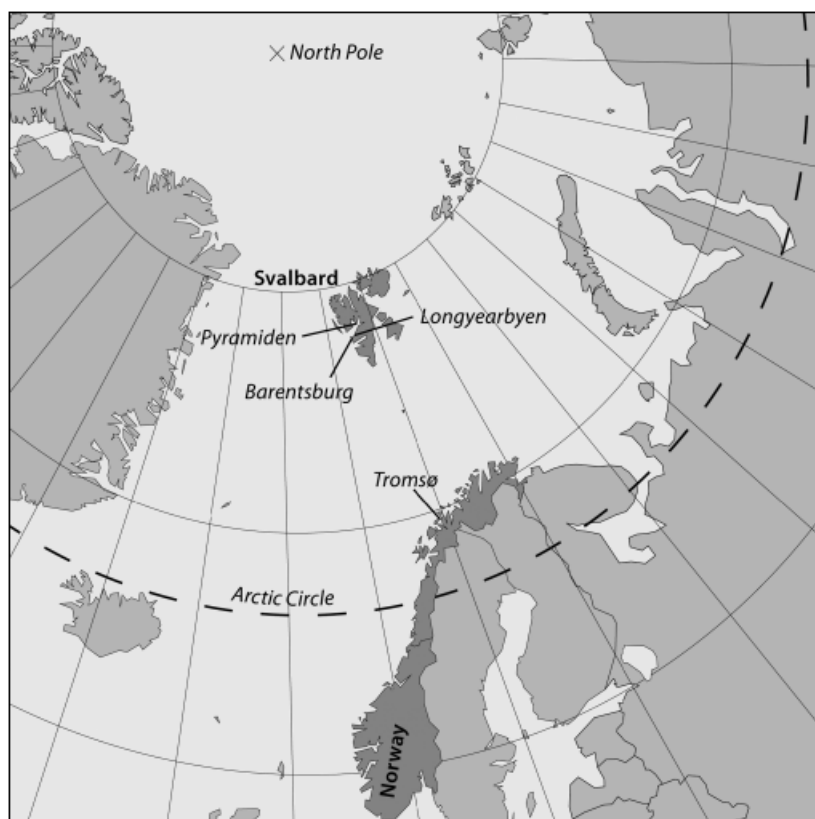

**Fig. 1.** Map of Svalbard and Norway. The Svalbard reindeer investigated were slaughtered grazing on natural pastures in Colesdalen and SG dalen outside Longyearbyen in Nordenskiöld Land, central Spitsbergen.

resulted in a unique rumen microbial ecosystem within these animals (Sundset *et al.*, 2007). In fact, > 90% of the bacterial 16S rRNA genes sequenced from the reindeer rumen represented novel strains (Sundset *et al.*, 2007).

Enteric methane emission from ruminants represents not only a loss of energy to the individual animal but also a source of this greenhouse gas (Thorpe, 2008). Up to 12% of the energy intake in domestic ruminants is lost in the form of methane, a gas produced by rumen methanogenic archaea using  $H_2$  to reduce  $CO_2$  (Johnson & Johnson, 1995). Cultivation-based studies of ruminal methanogens in Svalbard reindeer indicate very low population densities ( $10^4$ – $10^7$  cells  $mL^{-1}$  rumen fluid) (Orpin *et al.*, 1985) compared with those found in domestic ruminants ( $10^9$  cells  $mL^{-1}$  rumen fluid) (Skillman *et al.*, 2004). Low numbers of ruminal methanogens imply reduced methane emissions, something that could facilitate energy in favor of the growth and survival of these animals living under such austere nutritional conditions. Svalbard reindeer may therefore represent an interesting model to improve our understanding of the ecological importance of rumen methanogens. New insight would have practical applicability in developing strategies for reducing methane emissions from animal husbandry, as inhibition or removal of these microorganisms from the gastrointestinal tract ecosystem is considered important to reduce future climate change.

At present, knowledge of the rumen microbial ecology of Svalbard reindeer is limited to earlier cultivation-based studies (Mathiesen *et al.*, 2005), which are known to be limited in their ability to detect microorganisms compared with molecular-based approaches (Sundset *et al.*, 2007). Therefore, the objectives of the present study were to: (a) enumerate the rumen methanogens in Svalbard reindeer and assess their relative abundance compared with bacteria and protozoa using quantitative real-time PCR; (b) assess the population structure of bacteria and protozoa based on partial SSU rRNA gene analyses using denaturing gradient gel electrophoresis (DGGE); and (c) determine the phylogeny of the main ruminal methanogens present in Svalbard reindeer by constructing a 16S rRNA gene library.

## Materials and methods

### Animals and sampling

Five adult female Svalbard reindeer (SR1–SR5) grazing on late fall pasture (Coledalen, near Longyearbyen, Svalbard, October 2001) and five adult females (SR6–SR10) grazing on late winter pasture (SG dalen, near Longyearbyen, Svalbard, April 2002) were sacrificed in accordance with Norwegian regulations (sections 9 and 10 in the

Norwegian Animal Welfare Act) (Fig. 1). Whole rumen contents were collected from all animals immediately after slaughter and 5-mL aliquots were immediately frozen at  $-20^{\circ}\text{C}$  for DNA extraction and molecular analysis. Sub-samples of the frozen whole rumen contents were later fixed in a final concentration of 70% ethanol and stored at room temperature or at  $-20^{\circ}\text{C}$  until the commencement of real-time PCR and profiling of rumen microbial communities.

### DNA extraction

The quantitative real-time PCR and DGGE profiling were performed on DNA extracted using a glass–milk extraction method as described previously (Sundset *et al.*, 2009). For the methanogenic archaea clone library, total genomic DNA was extracted using a Power Soil™ DNA isolation kit (MO BIO Laboratories Inc., Carlsbad, CA) following the manufacturer's protocol.

### Quantitative real-time PCR analysis

For each microbial group (bacteria, methanogenic archaea and ciliate protozoa), three different sample aliquots of the Svalbard reindeer rumen contents were analyzed using real-time PCR as described previously by Sundset *et al.* (2009) using the bacterial 16S rRNA gene primers 1114F and 1275R (Denman & McSweeney, 2006), qmcrA-F and qmcrA-R primers targeting the methyl-coenzyme M reductase subunit for methanogenic archaea (Denman *et al.*, 2007), and P-SSU-316f and P-SSU-539r targeting the 18S rRNA gene of ciliate protozoa (Sylvester *et al.*, 2004). The external standards used for the real-time PCR amplifications have been validated previously for bacteria (Denman & McSweeney, 2006), ciliate protozoa (Sylvester *et al.*, 2004) and methanogenic archaea (Denman *et al.*, 2007). An unpaired two-tailed *t*-test was used to assess whether there was a significant effect ( $P < 0.05$ ) of season on the quantified number of cells within individual microbial groups.

### Bacterial 16S rRNA gene PCR for DGGE analysis

Amplification of the V6-8 region of the bacterial 16S rRNA gene was carried out with the primer pair F968GC and R1401 (Zoetendal & Akkermans, 1998). PCR amplifications were performed using a 2720 thermal cycler (Applied Biosystems, Warrington, UK) in 50- $\mu\text{L}$  volumes containing 1  $\times$  PCR buffer (20 mM Tris-HCl, pH 8.4, 50 mM KCl), 3 mM  $\text{MgCl}_2$ , 800  $\mu\text{M}$  dNTP, 25 pmol of each primer, 1.25 U of iTaq DNA polymerase (Bio-Rad UK Ltd, Hemel Hempstead, UK) and 1.0  $\mu\text{L}$  of template DNA (10 ng). Amplification conditions were: an initial denaturation of  $95^{\circ}\text{C}$  for 3 min, followed by 35 cycles ( $95^{\circ}\text{C}$  30 s,  $56^{\circ}\text{C}$  30 s and  $72^{\circ}\text{C}$  1 min) and a final extension of  $72^{\circ}\text{C}$  for 5 min. After PCR, amplification of products was verified by agarose gel electrophoresis.

### Ciliate protozoal 18S rRNA gene PCR for DGGE analysis

Amplification of the 18S rRNA gene of ciliate protozoa was carried out using the primers 316F (5'-GCT TTC GWT GGT AGT GTA TT-3') and 539R (5'-ACT TGC CCT CAA ATC GT-3'), with a 40 bp GC clamp at the 5' end (Huws *et al.*, 2009). PCR amplifications were performed using a 2720 thermal cycler (Applied Biosystems) in 50- $\mu\text{L}$  volumes containing 1  $\times$  PCR buffer (40 mM Tricine-KOH, 16 mM KCl, 3.5 mM  $\text{MgCl}_2$ , 3.75  $\mu\text{g mL}^{-1}$  bovine serum albumin), 800  $\mu\text{M}$  dNTP, 25 pmol of each primer, 1.0  $\mu\text{L}$  of 50  $\times$  Titanium Taq DNA polymerase (Clontech) and 1.0  $\mu\text{L}$  of template DNA (10 ng). Amplification conditions for the primer pair were: an initial denaturation of  $95^{\circ}\text{C}$  for 3 min, followed by 35 cycles ( $95^{\circ}\text{C}$  1 min,  $56^{\circ}\text{C}$  30 s and  $72^{\circ}\text{C}$  1 min) and a final extension of  $72^{\circ}\text{C}$  for 10 min. After PCR, amplification of products was verified by agarose gel electrophoresis.

### DGGE and gel analysis

For bacterial DGGE, samples were loaded onto a 6% (w/v) polyacrylamide gel with a 35–60% denaturing gradient [100% denaturant consisting of 40% (v/v) deionized formamide and 7 M urea]. For protozoal DGGE, samples were loaded onto an 8% (w/v) polyacrylamide gel with a 40–50% denaturing gradient. Electrophoresis was performed in a D-Code system (Bio-Rad UK Ltd). Both bacterial and protozoal DGGE gels were run initially for 10 min at 200 V, before electrophoresis for 16 h at 85 V in 0.5  $\times$  Tris-acetate-EDTA buffer (20 mM Tris-acetate, 0.5 mM EDTA) at a constant temperature of  $60^{\circ}\text{C}$  (Heilig *et al.*, 2002). At the completion of electrophoresis, the gels were then stained with silver nitrate (Sanguinetti *et al.*, 1994) and scanned using a GS-800 calibrated imaging densitometer (Bio-Rad UK Ltd). The saved images were then imported into the software package FINGER-PRINTING (Bio-Rad UK Ltd) for analysis (Fingerprint Types and Cluster Analysis modules). Cluster analysis was performed using the Dice similarity coefficient with a position tolerance of 0.5% and an optimization parameter of 1%, with clusters constructed using the unweighted pair-wise grouping with mathematical averages method. Differences in sample similarity values were considered to be significant when they were above the threshold values of 100% and 99%, respectively, for the bacteria and ciliate protozoa. Threshold values were generated by comparing the similarity of the marker lanes that were replicated in three different locations across the gel.

### Methanogen 16S rRNA gene clone library

Methanogenic archaeal 16S rRNA genes were PCR amplified using the primers Met86F and Met1340R (Wright & Pimm, 2003) as described by Sundset *et al.* (2009). The 16S rRNA gene amplicons (approximately 1.2 kb) from each of the five

Svalbard reindeer on late summer pasture (SR1–SR5) were pooled and then cloned using the TOPO TA Cloning<sup>®</sup> Kit for Sequencing (Invitrogen, Carlsbad, CA) according to the manufacturer's instructions. Clones containing the correct insert size were then sequenced on an ABI 3130x1 Genetic analyzer (Applied Biosystems, Foster City, CA) using ABI BigDye terminator chemistry.

### Sequence analysis

Archaeal 16S rRNA gene sequences were assembled using the program LASERGENE<sup>™</sup> SEQMAN v. 7.1.0. (DNASTAR Inc.), and then evaluated using the chimeric detection program BELLEROPHON (Huber *et al.*, 2004). Sequences were then compared with those deposited in GenBank using BASIC LOCAL ALIGNMENT SEARCH TOOL (BLAST) (Altschul *et al.*, 1997), and automatically aligned by CLUSTAL W in the software package BIOEDIT (v. 5.0.9) to give a uniform alignment length (1283 bp). Phylogenetic analysis was performed using the neighbor-joining method using the Kimura two-parameter correction model in the software MEGA (v. 3.1) (Kumar *et al.*, 2004) and bootstrap resampled 1000 times. The sequence data for the SRmet clones were assigned to operational taxonomic units (OTUs) based on a 98% sequence identity criterion. The 98% criterion was used following the argument by Wright *et al.* (2009) that the sequence similarity values between several validly recognized species of *Methanobrevibacter*; *Methanobrevibacter smithii*, *Methanobrevibacter millerae*, *Methanobrevibacter thaueri* and *Methanobrevibacter gottschalkii* were < 2%, which could underestimate methanogen diversity. This is higher than the previously reported 97% value for bacteria (Stackebrandt & Goebel, 1994). Sequences are deposited in the GenBank under accession numbers EU413569–EU413665.

## Results

### Rumen microbial population densities

The densities (cell numbers g<sup>-1</sup> wet weight) of rumen methanogenic archaea estimated using quantitative real-time PCR ranged from  $1.59 \times 10^7$  to  $7.11 \times 10^8$ , with the mean densities decreasing by 83% from October ( $3.02 \times 10^8$ ) to April ( $5.16 \times 10^7$ ) in the Svalbard reindeer (Table 1). The mean densities of methanogens relative to bacteria ranged from 0.06% in October to 0.03% in April. Bacterial densities ranged from  $1.52 \times 10^{10}$  to  $1.30 \times 10^{12}$ , with mean values decreasing by 65% from October ( $5.38 \times 10^{11}$ ) to April ( $1.86 \times 10^{11}$ ). Numbers of ciliate protozoa ranged from  $2.03 \times 10^4$  to  $8.01 \times 10^6$  and the mean numbers increased 95% between October ( $2.03 \times 10^5$ ) and April ( $3.68 \times 10^6$ ). We observed considerable variation between animals, but did not find statistically significant differences between the mean microbial densities in October and April, most likely due to similar food intake levels at these times of the year (Table 1).

**Table 1.** Densities (cell numbers g<sup>-1</sup> wet weight) of methanogenic archaea, bacteria and protozoa in the rumen of Svalbard reindeer grazing natural pasture in October (late fall) and April (late winter)

| Animals   | Methanogenic                                 |                                                    |                                              |
|-----------|----------------------------------------------|----------------------------------------------------|----------------------------------------------|
|           | archaea                                      | Bacteria                                           | Protozoa                                     |
| October   |                                              |                                                    |                                              |
| SR1       | $2.14 \times 10^7$                           | $1.83 \times 10^{11}$                              | $2.98 \times 10^5$                           |
| SR2       | $3.33 \times 10^8$                           | $1.30 \times 10^{12}$                              | $6.13 \times 10^5$                           |
| SR3       | $3.51 \times 10^8$                           | $1.23 \times 10^{11}$                              | $2.87 \times 10^4$                           |
| SR4       | $7.11 \times 10^8$                           | $4.11 \times 10^{10}$                              | $2.03 \times 10^4$                           |
| SR5       | $9.34 \times 10^7$                           | $1.04 \times 10^{12}$                              | $5.65 \times 10^4$                           |
| Mean (SE) | $3.02 \times 10^8$<br>( $1.21 \times 10^8$ ) | $5.38 \times 10^{11}$<br>( $2.63 \times 10^{11}$ ) | $2.03 \times 10^5$<br>( $1.15 \times 10^5$ ) |
| April     |                                              |                                                    |                                              |
| SR6       | $7.45 \times 10^7$                           | $1.52 \times 10^{10}$                              | $2.23 \times 10^6$                           |
| SR7       | $3.64 \times 10^7$                           | $1.20 \times 10^{11}$                              | $2.52 \times 10^5$                           |
| SR8       | $4.57 \times 10^7$                           | $5.65 \times 10^{11}$                              | $5.67 \times 10^6$                           |
| SR9       | $8.54 \times 10^7$                           | $1.31 \times 10^{11}$                              | $1.25 \times 10^6$                           |
| SR10      | $1.59 \times 10^7$                           | $9.88 \times 10^{10}$                              | $8.01 \times 10^6$                           |
| Mean (SE) | $5.16 \times 10^7$<br>( $1.27 \times 10^7$ ) | $1.86 \times 10^{11}$<br>( $9.68 \times 10^{10}$ ) | $3.68 \times 10^6$<br>( $1.42 \times 10^6$ ) |
| P-value   | 0.074                                        | 0.245                                              | 0.055                                        |

### DGGE analysis of reindeer rumen microbiota

The DGGE profiles of the rumen bacterial populations did not show any obvious clustering by sampling time (Fig. 2). However, the bacterial populations of the animals grazing on October pasture (SR1–SR5) were generally more variable than those on April grazing (SR6–SR10), and there was no obvious effect of sampling time on protozoal population composition either (Fig. 3). Five of the animals (one from October pasture and four from April pasture) shared the same dominant band positions, resulting in their profiles forming a tight cluster (Fig. 3b).

### Phylogenetic diversity of methanogenic archaea

The phylogeny of the dominant rumen methanogenic archaea was investigated in Svalbard reindeer grazing on October pasture through comparative analyses of 16S rRNA gene sequences ( $n = 97$  clones) (Fig. 4, Table 2). A total of 22 distinct OTUs were identified using a 98% similarity criterion, which was established based on the similarity of 16S rRNA genes from characterized *Methanobrevibacter* species. Eleven of the OTUs generated from the rumen of the Svalbard reindeer exhibited a high degree of similarity to methanogens affiliated with three higher taxonomic groupings including the *Methanobacteriales* (eight OTUs, 44% of the clones), *Methanomicrobiales* (one OTU) and *Methanosarcinales* (two OTUs), while the rest of the 11 OTUs (53% of the clones) clustered with a group of uncultivated archaea previously found in other ruminants examined in recent



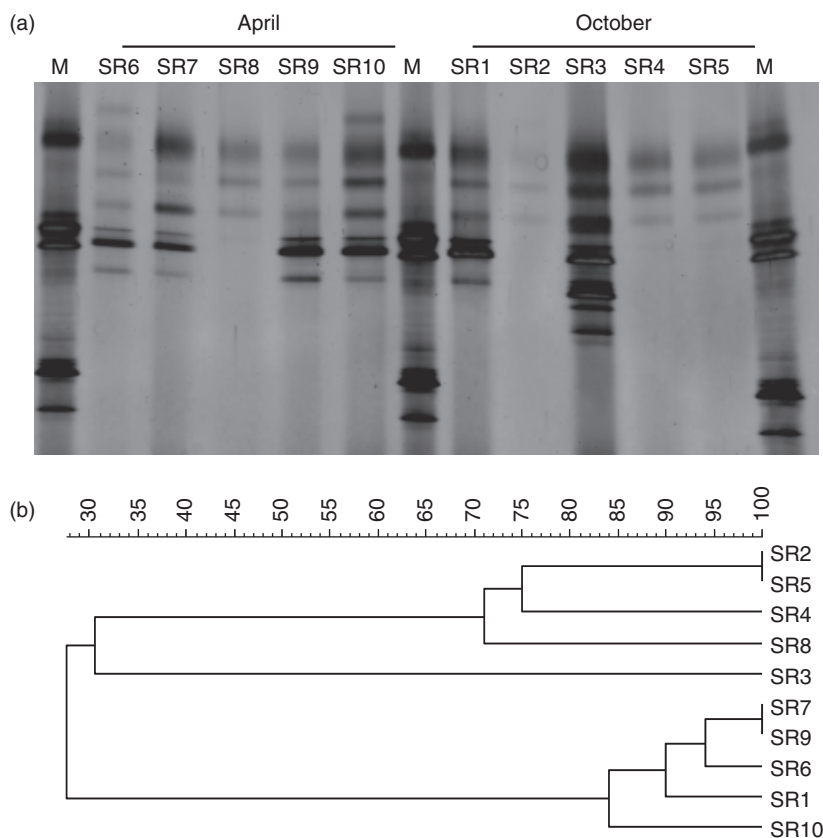

**Fig. 3.** DGGE profiles of rumen protozoal 18S rRNA genes amplified using total genomic DNA extracted from rumen content samples (a), and their corresponding cluster analysis (b). Samples of whole rumen contents were collected from Svalbard reindeer grazing on natural October (SR1–SR5) and April (SR6–SR10) pastures. Gel markers (M) were replicated across the gel, and the similarity of their profiles (75%) was used as a threshold value for assessing differences between samples.

## Discussion

In contrast to the small variations in the diversity of rumen methanogens between reindeer and other geographically and/or genetically distant ruminants (Sundset *et al.*, 2009), studies so far indicate that the bacterial population of the reindeer is unique (Mackie *et al.*, 2003; Sundset *et al.*, 2007, 2008). In fact, the majority of the rumen bacterial 16S rRNA gene sequences retrieved from Svalbard and Norwegian reindeer were novel and did not match any known isolates or clones in GenBank (Sundset *et al.*, 2007). It is speculated that the reason for this may be associated with the harshness of their environment, in particular the extreme seasonal changes in diet, appetite and dietary intake that occur compared with what domesticated ruminants are normally exposed to.

Previous studies of Svalbard reindeer on Nordenskiöld Land at 78°N on Spitsbergen (Fig. 1), where the tundra vegetation is relatively abundant, did not reveal seasonal variations in the ruminal contents of plant cell wall organic dry matter or the mean ruminal pH (Sørmo *et al.*, 1997). However, the ruminal production rate of SCFA was low or not detectable in winter while it was 55 kJ kg<sup>-1</sup> BM<sup>0.75</sup> day<sup>-1</sup> in autumn in animals on Nordenskiöld Land (Sørmo *et al.*, 1997), reflecting the seasonal changes in their pastures.

Cultivation-based studies indicate that the numbers and composition of the rumen microorganisms in the Svalbard reindeer change with the season and chemistry of the pasture plants consumed, with large winter populations of rumen cellulolytic bacteria making their digestive system highly suitable for energy utilization of poor-quality food through slow rumen breakdown and fermentation (Mathiesen *et al.*, 2005). Rumen bacterial analysis in this study did not show any significant effect from October (late fall) to April (late winter) on the bacterial population size or composition in the Svalbard reindeer, although within the group of animals grazing the October pasture, larger differences were noted in the bacterial population composition. Appetite and activity levels are similar in October and April, but a larger variety of plant types may be available within the late fall vegetation, compared with the snow- and ice-covered winter pasture of mosses and low-quality vascular plants (Larsen *et al.*, 1985; Mathiesen *et al.*, 2005; van Oort *et al.*, 2007). It is also possible that the bacterial population structure of individual animals may be more variable than changes associated with season. Future studies with the same animals over the course of several seasons are needed to verify whether this is indeed the case. Interestingly, although bacteria are an important nitrogen source for protozoal growth, their numbers did not significantly change when ciliate numbers increased in winter.

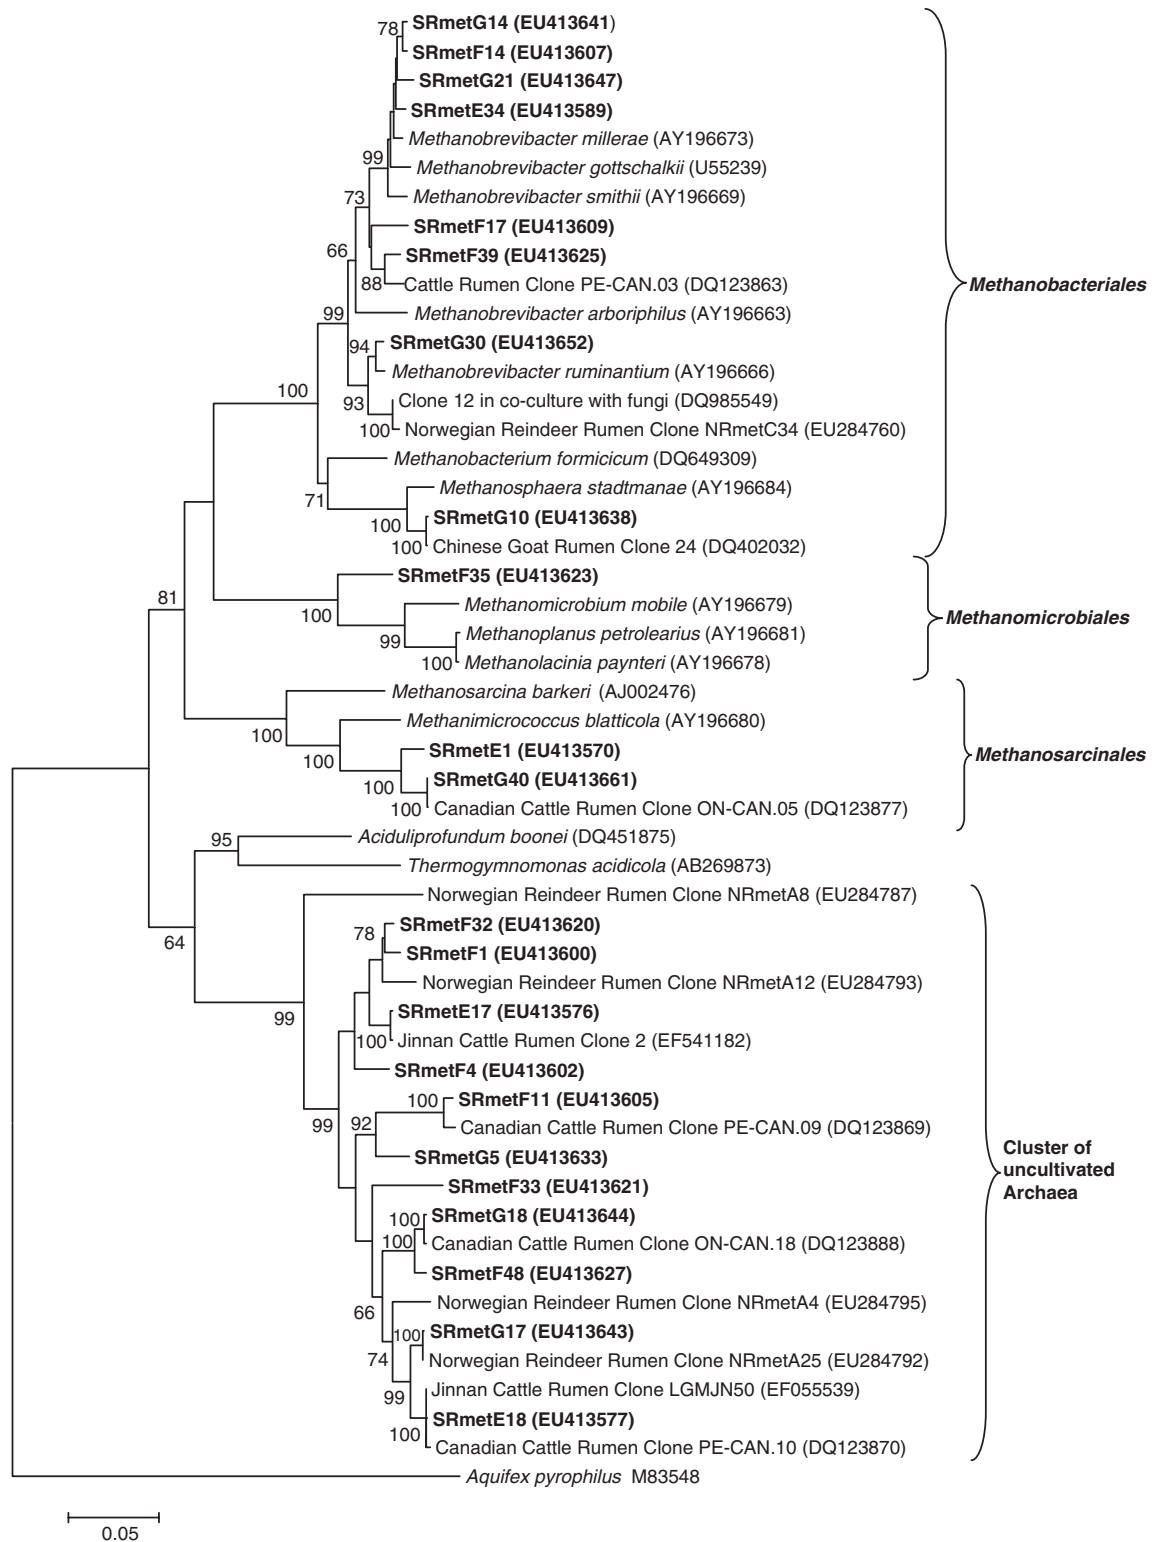

**Fig. 4.** Phylogenetic tree of rumen methanogenic archaeal 16S rRNA gene sequences from Svalbard reindeer (SRmet clones) representing 22 OTUs associated with the higher taxonomic groupings *Methanobacteriales*, *Methanomicrobiales*, *Methanosarcinales* and the cluster of uncultivated archaea as indicated. The scale bar represents 5% sequence divergence. Reference sequences were obtained from the GenBank database. Bootstrap values > 60% are presented. Accession numbers are given immediately following the species/strain/clone designation. Clones obtained from the rumen of the Norwegian reindeer (Sundset *et al.*, 2009) are called NRmet clones. The *Aquifex pyrophilus* sequence was used as an outgroup for rooting the tree.

**Table 2.** Rumen methanogenic archaeal 16S rRNA gene clones from Svalbard reindeer grazing October pasture

| 16S rRNA gene OTUs | No. of clones* | Size (bp) | GenBank accession no. | Nearest valid taxon                    | Sequence identity (%) |
|--------------------|----------------|-----------|-----------------------|----------------------------------------|-----------------------|
| SRmetG14           | 20             | 1234      | EU413641              | <i>Methanobrevibacter millerae</i>     | 98                    |
| SRmetF11           | 14             | 1214      | EU413605              | <i>Aciduliprofundum boonei</i>         | 81 <sup>†</sup>       |
| SEmetF17           | 10             | 1238      | EU413609              | <i>Methanobrevibacter gottschalkii</i> | 96 <sup>†</sup>       |
| SRmetG18           | 9              | 1256      | EU413644              | <i>A. boonei</i>                       | 81 <sup>†</sup>       |
| SRmetF33           | 7              | 1276      | EU413621              | <i>A. boonei</i>                       | 81 <sup>†</sup>       |
| SRmetE34           | 6              | 1289      | EU413589              | <i>M. millerae</i>                     | 98                    |
| SRmetE18           | 5              | 1281      | EU413577              | <i>A. boonei</i>                       | 80 <sup>†</sup>       |
| SRmetG17           | 4              | 1214      | EU413643              | <i>A. boonei</i>                       | 81 <sup>†</sup>       |
| SRmetE17           | 4              | 1257      | EU413576              | <i>A. boonei</i>                       | 82 <sup>†</sup>       |
| SRmetF4            | 4              | 1285      | EU413602              | <i>Thermogymnomonas acidicola</i>      | 82 <sup>†</sup>       |
| SRmetG10           | 2              | 1219      | EU413638              | <i>Methanosphaera stadtmanae</i>       | 97 <sup>†</sup>       |
| SRmetG30           | 2              | 1213      | EU413652              | <i>Methanobrevibacter ruminantium</i>  | 99                    |
| SRmetF1            | 1              | 1286      | EU413600              | <i>A. boonei</i>                       | 83 <sup>†</sup>       |
| SRmetG5            | 1              | 1228      | EU413633              | <i>A. boonei</i>                       | 81 <sup>†</sup>       |
| SRmetF48           | 1              | 1268      | EU413627              | <i>A. boonei</i>                       | 81 <sup>†</sup>       |
| SRmetF35           | 1              | 1287      | EU413623              | <i>Methanomicrobium mobile</i>         | 93 <sup>†</sup>       |
| SRmetF32           | 1              | 1230      | EU413620              | <i>Thermogymnomonas acidicola</i>      | 82 <sup>†</sup>       |
| SRmetG40           | 1              | 1268      | EU413661              | <i>Methanimicrococcus blatticola</i>   | 92 <sup>†</sup>       |
| SRmetE1            | 1              | 1258      | EU413570              | <i>M. blatticola</i>                   | 91                    |
| SRmetG21           | 1              | 1219      | EU413647              | <i>M. millerae</i>                     | 97 <sup>†</sup>       |
| SRmetF39           | 1              | 1246      | EU413625              | <i>M. gottschalkii</i>                 | 95 <sup>†</sup>       |
| SRmetF14           | 1              | 1296      | EU413607              | <i>M. gottschalkii</i>                 | 98                    |

\*In total 97 clones were examined.

<sup>†</sup>Potential new species based on the 98% identity criterion.

Svalbard reindeer survive the winter by reducing their energy expenditure to a minimum, and mobilizing fat reserves (Mathiesen *et al.*, 2005). Previous studies by Tyler (1987) showed that the carcass mass of Svalbard reindeer reduced from 72 kg in summer to 46 kg in winter when they have to mobilize a large proportion of their protein and energy reserves. Additionally, a large rumen with high concentrations of cellulolytic bacteria (Orpin *et al.*, 1985), and probably longer retention times, may represent an adaptation that allows the Svalbard reindeer to optimize their ruminal utilization of low-quality fibrous food devoid of lichens (Mathiesen *et al.*, 2005). These factors may provide conditions that favor populations of ciliate protozoa.

Since the publication of data on ruminal methanogen population sizes in Norwegian reindeer (Sundset *et al.*, 2009), the methanogen real-time primers Met630F and Met803R were also recently found to amplify bacteria under some conditions, potentially overestimating the numbers of methanogens (A.-D.G. Wright, pers. commun.). This may explain the considerably higher numbers of rumen methanogens reported in Norwegian reindeer (Sundset *et al.*, 2009) compared with those reported for Svalbard reindeer in this study, which were generated using primers targeting the *mcrA* gene (only found in methanogenic archaea). Quantification of the ruminal methanogens in Norwegian reindeer was repeated using the *mcrA* based real-time PCR

**Table 3.** Densities (cell numbers g<sup>-1</sup> wet weight) of methanogenic archaea in Norwegian reindeer grazing natural summer pasture

| Animals*  | Methanogenic archaea                             |
|-----------|--------------------------------------------------|
| NR1       | 4.65 × 10 <sup>8</sup>                           |
| NR2       | 1.54 × 10 <sup>8</sup>                           |
| NR3       | 5.92 × 10 <sup>8</sup>                           |
| NR4       | 1.71 × 10 <sup>8</sup>                           |
| NR5       | 6.22 × 10 <sup>8</sup>                           |
| Mean (SE) | 4.01 × 10 <sup>8</sup> (1.01 × 10 <sup>8</sup> ) |

\*Animals and sampling described by Sundset *et al.* (2009).

method (Table 3), and methanogen numbers were indeed found to be significantly lower than those published previously (Sundset *et al.*, 2009). This finding therefore indicates that ruminal methanogen population sizes are comparable in both Svalbard and Norwegian reindeer.

Despite similar methanogen population sizes, the ruminal protozoal population size in Svalbard reindeer (2.03 × 10<sup>5</sup> cells g<sup>-1</sup> wet weight) was much lower than that in Norwegian reindeer (4.02 × 10<sup>7</sup> cells g<sup>-1</sup> wet weight) (Sundset *et al.*, 2009). A decrease in the numbers of ciliate protozoa would normally be expected to be associated with a decline in the numbers of methanogens, as many of the ruminal methanogens live in close association with protozoa (Vogels *et al.*, 1980; Regensbogenova *et al.*, 2004). It is



therefore likely that a significant proportion of the methanogens present in the rumen of Svalbard reindeer are not closely associated with ciliate protozoa. In domestic ruminants, removal of ruminal protozoa can result in a decrease in methane emissions of up to 40% (Finlay *et al.*, 1994; Newbold *et al.*, 1995; Dohme *et al.*, 1999).

Little was previously known about the population composition of rumen methanogens in Svalbard reindeer, and how they compared with Norwegian reindeer (Sundset *et al.*, 2009). The findings of this study indicate that the dominant methanogens in both types of reindeer are similar, although the proportion of uncultivated ruminal archaeal 16S rRNA gene sequences [belonging to the previously described Rumen Cluster C (Janssen & Kirs, 2008)] was much higher in the Svalbard reindeer (53%) compared with the Norwegian reindeer (17%). As these methanogens are not culturable using standard approaches, this observation may also partly explain why previous cultivation-based numbers from Svalbard reindeer [ $10^4$ – $10^7$  cells mL<sup>-1</sup> rumen fluid (Orpin *et al.*, 1985)] are lower than the numbers obtained by molecular approaches ( $10^7$ – $10^8$  cells g<sup>-1</sup> wet weight). This analysis confirms that the population densities of rumen methanogenic archaea in Svalbard and Norwegian reindeer (presented in this paper) are lower than those typically found in domestic ruminants such as sheep ( $10^8$ – $10^9$ ; Skillman *et al.*, 2004) and cattle (up to  $1.34 \times 10^9$ ; Denman *et al.*, 2007).

Host type appears to have a significant effect on rumen methanogen population size, with reindeer having less methanogens than domesticated sheep and cattle. The similarity of the rumen archaeal 16S rRNA gene sequences obtained from the Svalbard and Norwegian reindeer to those reported in geographically distant domestic ruminants (Tajima *et al.*, 2001; Wright *et al.*, 2007, 2008; Ohene-Adjei *et al.*, 2008) supports previous findings that there seems to be no host type or geographical effect on the species distribution of ruminal methanogens.

In conclusion, the geographically isolated Svalbard reindeer are unique ruminants that can provide insights into the adaptation and resilience of ruminal microbiota in wild ruminants. No consistent differences were detected in the microbial population composition of protozoa and bacteria between reindeer on late autumn pasture in October and late winter pasture in April when food intakes are at similar levels, while animal variations were considerable. Similarly, microbial numbers did not change significantly between October and April, although there was a tendency for the methanogenic archaea to be higher in October than in April ( $P=0.074$ ), and the ciliate numbers to be lower ( $P=0.055$ ). Although reindeer have much smaller populations of rumen methanogens than domesticated sheep and cattle, methane emissions from both domestic and wild reindeer populations across the world (estimated to about 5 million animals) remain to be measured.

## Acknowledgements

We thank the sequencing laboratory at the Medical Faculty, University of Tromsø, for their work sequencing the 16S rRNA genes for the clone library. We also thank Prof. Mike Theodorou and Prof. Jamie Newbold for their support of the analyses conducted at Aberystwyth University. We are grateful to Prof. Karl-Arne Stokkan for his help with activity and intake data on Svalbard reindeer. This study is linked to the framework of the International Polar Year (IPY) as part of the consortium IPY # 399 EALAT: *Climate change and reindeer husbandry* and funded by the Roald Amundsen Centre for Arctic Research (Project number 200507652), the University of Tromsø (Institute of Medical Biology) and the Norwegian Research Council (Project number 641225 S5258).

## References

- Altschul SF, Madden TL, Schäffer AA, Zhang J, Chang Z, Miller W & Lipman DJ (1997) Gapped BLAST and PSI-BLAST: a new generation of protein database search programs. *Nucleic Acids Res* **25**: 3389–3402.
- Denman SE & McSweeney CS (2006) Development of a real-time PCR assay for monitoring anaerobic fungal and cellulolytic bacterial populations within the rumen. *FEMS Microbiol Ecol* **58**: 572–582.
- Denman SE, Tomkins NW & McSweeney CS (2007) Quantitation and diversity analysis of ruminal methanogenic populations in response to the antimethanogenic compound bromo-chloromethane. *FEMS Microbiol Ecol* **62**: 313–322.
- Dohme F, Machmüller A, Estermann BL, Pfister P, Wasserfallen A & Kreuzer M (1999) The role of the rumen ciliate protozoa for methane suppression caused by coconut oil. *Lett Appl Microbiol* **29**: 187–192.
- Finlay BJ, Esteban G, Clarke KJ, Williams AG, Embley TM & Hirt RP (1994) Some rumen ciliates have endosymbiotic methanogens. *FEMS Microbiol Lett* **117**: 157–161.
- Heilig H, Zoetendal EG, Vaughan E, Marteau P, Akkermans A & de Vos W (2002) Molecular diversity of *Lactobacillus* spp. and other lactic acid bacteria in the human intestine as determined by specific amplification of 16S ribosomal DNA. *Appl Environ Microb* **68**: 114–123.
- Huber T, Faulkner G & Hugenholtz P (2004) Bellerophon: a program to detect chimeric sequences in multiple sequence alignments. *Bioinformatics* **20**: 2317–2319.
- Huws SA, Kim EJ, Kingston-Smith AH, Lee MRF, Muetzel SM, Newbold CJ, Wallace RJ & Scollan ND (2009) Rumen protozoa are rich in polyunsaturated fatty acids due to the ingestion of chloroplasts. *FEMS Microbiol Ecol* **69**: 461–471.
- Janssen PH & Kirs M (2008) Structure of the archaeal community of the rumen. *Appl Environ Microb* **74**: 3619–3625.
- Johnson KA & Johnson DE (1995) Methane emissions from cattle. *J Anim Sci* **73**: 2483–2492.

- Kumar S, Tamura K & Nei M (2004) MEGA3: integrated software for molecular evolutionary genetics analysis and sequence alignment. *Brief Bioinform* **5**: 150–163.
- Larsen TS, Nilsson NÖ & Blix AS (1985) Seasonal changes in lipogenesis and lipolysis in isolated adipocytes from Svalbard and Norwegian reindeer. *Acta Physiol Scand* **123**: 97–104.
- Mackie RI, Aminov RI, Hu W, Klieve AV, Ouwerkerk D, Sundset MA & Kamagata Y (2003) Ecology of uncultivated *Oscillospira* species in the rumen of cattle, sheep, and reindeer as assessed by microscopy and molecular approaches. *Appl Environ Microb* **69**: 6808–6815.
- Mathiesen SD, Mackie RI, Aschfalk A, Ringø E & Sundset MA (2005) Microbial ecology of the gastrointestinal tract in reindeer – changes through season. *Microbial Ecology of the Growing Animal; Biology of the Growing Animals, Vol. 3* (Holzapfel W & Naughton P, eds), pp. 73–100. Elsevier Press, Oxford.
- Newbold CJ, Lassalas B & Jouany J-P (1995) The importance of methanogens associated with ciliate protozoa in ruminal methane production *in vitro*. *Lett Appl Microbiol* **21**: 230–234.
- Ohene-Adjei S, Chaves AV, McAllister TA, Benchaar A, Teather RM & Forster RJ (2008) Evidence of increased diversity of methanogenic archaea with plant extract supplementation. *Microb Ecol* **56**: 234–242.
- Orpin CG, Mathiesen SD, Greenwood I & Blix AS (1985) Seasonal changes in the ruminal microflora of the High-Arctic Svalbard reindeer (*Rangifer tarandus platyrhynchus*). *Appl Environ Microb* **50**: 144–151.
- Regensbogenova M, McEwan NR, Javorsky P, Kisidayova S, Michalowski T, Newbold CJ, Hackstein JHP & Pristas P (2004) A re-appraisal of the diversity of the methanogens associated with the rumen ciliates. *FEMS Microbiol Lett* **238**: 307–313.
- Sanguinetti CJ, Dias E & Simpson AJ (1994) Rapid silver staining and recovery of PCR products separated on polyacrylamide gels. *BioTechniques* **17**: 914–921.
- Skillman LC, Evans PN, Naylor GE, Morvan B, Graeme MJ & Joblin KN (2004) 16S ribosomal DNA-directed PCR primers for ruminal methanogens and identification of methanogens colonizing young lambs. *Anaerobe* **10**: 277–285.
- Sørmo W, Haga ØE, White RG & Mathiesen SD (1997) Comparative aspects of volatile fatty acid production in the rumen and distal fermentation chamber in Svalbard reindeer. *Rangifer* **17**: 81–95.
- Sørmo W, Haga ØE, Gaare E, Langvatn R & Mathiesen SD (1999) Forage chemistry and fermentation chambers in Svalbard reindeer (*Rangifer tarandus platyrhynchus*). *J Zool* **247**: 247–256.
- Stackebrandt E & Goebel BM (1994) A place for DNA–DNA reassociation and 16S ribosomal-RNA sequence-analysis in the present species definition in bacteriology. *Int J Syst Bacteriol* **44**: 846–849.
- Sundset MA, Præsteng KE, Cann IKO, Mathiesen SD & Mackie RI (2007) Novel rumen bacterial diversity in two geographically separated sub-species of reindeer. *Microbial Ecol* **54**: 424–438.
- Sundset MA, Kohn A, Mathiesen SD & Præsteng KE (2008) *Eubacterium rangiferina*, a novel usnic acid-resistant bacterium from the reindeer rumen. *Naturwissenschaften* **95**: 741–749.
- Sundset MA, Edwards JE, Cheng YF, Senosiain RS, Fraile MN, Northwood KS, Præsteng KE, Glad T, Mathiesen SD & Wright A-DG (2009) Molecular diversity of the rumen microbiome of Norwegian reindeer on natural summer pasture. *Microbial Ecol* **57**: 335–348.
- Sylvester JT, Karnati SKR, Yu Z, Morrison M & Firkins JL (2004) Development of an assay to quantify rumen ciliate protozoal biomass in cows using real-time PCR. *J Nutr* **134**: 3378–3384.
- Tajima K, Nagamine T, Matsui H, Nakamura M & Aminov RI (2001) Phylogenetic analysis of archaeal 16S rRNA libraries from the rumen suggests the existence of a novel group of archaea not associated with known methanogens. *FEMS Microbiol Lett* **200**: 67–72.
- Thorpe A (2008) Enteric fermentation and ruminant eructation: the role (and control?) of methane in the climate change debate. *Climatic Change* **93**: 407–431.
- Tyler NJC (1987) Body composition and energy balance of pregnant and non pregnant Svalbard reindeer during winter. *Zool Soc Lond Symp* **57**: 203–229.
- Tyler NJC & Øritsland NA (1989) Why don't Svalbard reindeer migrate? *Holarctic Ecol* **12**: 369–376.
- van Oort BEH, Tyler NJC, Gerkema MP, Folkow L & Stokkan K-A (2007) Where clocks are redundant: weak circadian mechanisms in reindeer living under polar photic conditions. *Naturwissenschaften* **94**: 183–194.
- Vogels GD, Hoppe WF & Stumm CK (1980) Association of methanogenic bacteria with rumen ciliates. *Appl Environ Microb* **40**: 608–612.
- Wright A-DG & Pimm C (2003) Improved strategy for presumptive identification of methanogens using 16S riboprinting. *J Microbiol Meth* **55**: 337–349.
- Wright A-DG, Auckland CH & Lynn DH (2007) Molecular diversity of methanogens in feedlot cattle from Ontario and Prince Edward Island, Canada. *Appl Environ Microb* **73**: 4206–4210.
- Wright A-DG, Ma X & Obispo NE (2008) *Methanobrevibacter* phylotypes are the dominant methanogens in sheep from Venezuela. *Microbial Ecol* **56**: 390–394.
- Wright A-DG, Northwood KS & Obispo NE (2009) Rumen-like methanogens identified from the crop of the folivorous South American bird, the hoatzin (*Opisthocomus hoazin*). *ISME J* DOI: 10.1038/ismej.2009.41.
- Zoetendal EG, Akkermans ADL & De Vos WM (1998) Temperature gradient gel electrophoresis analysis from human fecal samples reveals stable and host-specific communities of active bacteria. *Appl Environ Microb* **64**: 3854–3859.
